# Supplementary material
Source: publisher figshare collection journal article supplement (https://karger.figshare.com/articles/dataset/_/7969646)
Supplement: Supplementary file 1 [file 1]

**Table S1. TNM grading and metastasis status of patients at baseline**

| <b>TNM grading</b> | <b>n (%)</b> | <b>T0</b> | <b>T1</b> | <b>T2</b> | <b>T3</b> | <b>T4</b> | <b>T unknown</b> | <b>N0</b> | <b>N1</b> | <b>N unknown</b> |
|--------------------|--------------|-----------|-----------|-----------|-----------|-----------|------------------|-----------|-----------|------------------|
| M0                 | 6 (13%)      | 1         | 0         | 1         | 3         | 1         | 0                | 3         | 3         | 0                |
| M1                 | 33 (72%)     | 2         | 2         | 8         | 7         | 12        | 2                | 11        | 19        | 3                |
| Unknown            | 7 (15%)      | 0         | 0         | 0         | 0         | 1         | 6                | 1         | 0         | 6                |
| Total              | 46           | 3         | 2         | 9         | 10        | 14        | 8                | 15        | 22        | 9                |

TNM Tumour Node Metastasis

**Table S2. WHO (2010) grading of tumours and Ki67 scores for patients at baseline**

| <b>WHO (2010) Tumour Classification</b> | <b>n (%)</b> | <b>Ki 67 Index Score Mean, SD (n)</b> |
|-----------------------------------------|--------------|---------------------------------------|
| G1                                      | 15 (33%)     | 1.5, 1.2 (n=13)                       |
| G2                                      | 24 (52%)     | 10.4, 8.7 (n=20)                      |
| G3                                      | 1 (0.02%)    | 26, 26 (n=1)                          |
| unknown                                 | 6 (13%)      | -                                     |

**Table S3. Number of anti-cancer treatments prior to everolimus initiation**

| <b>Number of previous treatments</b> | <b>No. of patients</b> | <b>% (n=48)</b> |
|--------------------------------------|------------------------|-----------------|
| 0                                    | 12                     | 25%             |
| 1                                    | 17                     | 35%             |
| 2                                    | 6                      | 13%             |
| 3                                    | 9                      | 19%             |
| 4                                    | 2                      | 4%              |
| 5                                    | 2                      | 4%              |
| <b>Total</b>                         | <b>48</b>              | -               |

**Table S4. Therapies received prior to start of everolimus**

| <b>Therapies received PRIOR to start of everolimus</b>               | <b>No. of patients</b> | <b>% (n=48)</b> |
|----------------------------------------------------------------------|------------------------|-----------------|
| Proton pump inhibitors                                               | 16                     | 33%             |
| Somatostatin and analogs                                             | 11                     | 23%             |
| Anilides                                                             | 9                      | 19%             |
| Biguanides                                                           | 7                      | 15%             |
| 5-hydroxy-3-methylglutaryl-coenzyme A (HMG CoA) reductase inhibitors | 6                      | 13%             |
| Natural opium alkaloids                                              | 6                      | 13%             |
| Propulsives                                                          | 5                      | 10%             |
| Salicylic acid and derivatives                                       | 4                      | 8%              |
| Sulfonamides, urea derivatives                                       | 4                      | 8%              |
| Angiotensin converting enzyme (ACE) inhibitors, plain                | 3                      | 6%              |
| Alpha-adrenoreceptor antagonists                                     | 3                      | 6%              |
| Antipropulsives                                                      | 3                      | 6%              |
| Beta-lactamase sensitive penicillins                                 | 3                      | 6%              |
| Dihydropyridine derivatives                                          | 3                      | 6%              |
| Heparin group                                                        | 3                      | 6%              |
| Opium alkaloids and derivatives                                      | 3                      | 6%              |
| Selective serotonin reuptake inhibitors                              | 3                      | 6%              |
| Ophthalmologicals                                                    | 13                     | 27%             |
| Unspecified herbal and traditional medicine                          | 4                      | 8%              |

**Table S5. Reasons for discontinuation of everolimus treatment**

| <b>Reasons for discontinuation (FAS)</b> | <b>n</b> | <b>%</b> |
|------------------------------------------|----------|----------|
| Patients who discontinued                | 23       |          |
| Reasons for discontinuation              |          |          |
| Adverse event                            | 11       | 48%      |
| Disease progression                      | 4        | 17%      |
| Unsatisfactory therapeutic effect        | 2        | 9%       |
| Death                                    | 1        | 4%       |
| Lost to follow-up                        | 1        | 4%       |
| Unknown                                  | 4        | 17%      |

**Table S6. EORTC QLQ-C30 scores during the first 6 months of treatment with everolimus.** Data presented as: <sup>a</sup>mean (Standard deviation); <sup>b</sup>mean (95% confidence intervals); <sup>c</sup>% change in mean from baseline.

|                                                   | Post-initiation visit  |                       |                        |                       |                        |                      |
|---------------------------------------------------|------------------------|-----------------------|------------------------|-----------------------|------------------------|----------------------|
|                                                   | Month 1                | Month 2               | Month 3                | Month 4               | Month 5                | Month 6              |
| <b>EORTC QLQ-C30: Global health status</b>        |                        |                       |                        |                       |                        |                      |
| <b>Number of patients with paired scores</b>      | 44                     | 43                    | 36                     | 36                    | 33                     | 30                   |
| <b>Baseline score<sup>a</sup></b>                 | 58.0 (20.3)            | 57.6 (20.9)           | 56.7 (20.0)            | 56.0 (19.8)           | 56.6 (19.2)            | 56.9 (17.9)          |
| <b>Post-initiation score at Month<sup>a</sup></b> | 54.2 (24.9)            | 56.8 (22.8)           | 50.9 (19.9)            | 59.3 (20.5)           | 53.3 (19.9)            | 55.0 (18.5)          |
| <b>Absolute change<sup>b</sup></b>                | -3.8<br>(-11.8 to 4.3) | -0.8<br>(-7.3 to 5.7) | -5.8<br>(-12.9 to 1.3) | 3.2<br>(-4.7 to 11.2) | -3.3<br>(-12.8 to 6.2) | -1.9<br>(-10.9 to 7) |
| <b>% Change<sup>c</sup></b>                       | -6.5%                  | -1.3%                 | -10.2%                 | 5.8%                  | -5.8%                  | -3.4%                |
| <b>EORTC QLQ-C30: Physical functioning</b>        |                        |                       |                        |                       |                        |                      |
| <b>Number of patients with paired scores</b>      | 44                     | 43                    | 36                     | 36                    | 33                     | 30                   |
| <b>Baseline score<sup>a</sup></b>                 | 75.5 (21.2)            | 74.1 (23.1)           | 75.0 (20.4)            | 74.4 (21.4)           | 75.2 (20.8)            | 75.8 (20.3)          |

|                                                | Post-initiation visit                |                      |                                       |                        |                                       |                        |
|------------------------------------------------|--------------------------------------|----------------------|---------------------------------------|------------------------|---------------------------------------|------------------------|
|                                                | Month 1                              | Month 2              | Month 3                               | Month 4                | Month 5                               | Month 6                |
| <b>Post-initiation Month score<sup>a</sup></b> | 70.6 (23.4)                          | 70.1 (24.2)          | 65.2 (25.8)                           | 70.4 (25.7)            | 68.1 (25.0)                           | 72.7 (21.1)            |
| <b>Absolute change<sup>b</sup></b>             | <b>-4.8</b><br><b>(-9.6 to -0.1)</b> | -4<br>(-9.3 to 1.3)  | <b>-9.8</b><br><b>(-16.8 to -2.8)</b> | -4.1<br>(-10.1 to 1.9) | <b>-7.1</b><br><b>(-14.1 to -0.1)</b> | -3.1<br>(-9.8 to 3.6)  |
| <b>% Change<sup>c</sup></b>                    | -6.4%                                | -5.4%                | -13.1%                                | -5.5%                  | -9.4%                                 | -4.1%                  |
| <b>EORTC QLQ-C30: Role functioning</b>         |                                      |                      |                                       |                        |                                       |                        |
| <b>Number of patients with paired scores</b>   | 44                                   | 43                   | 36                                    | 36                     | 33                                    | 30                     |
| <b>Baseline score<sup>a</sup></b>              | 64.8 (30.5)                          | 62.8 (31.9)          | 62.5 (31.0)                           | 62.0 (30.8)            | 64.6 (32.2)                           | 66.1 (28.9)            |
| <b>Post-initiation Month score<sup>a</sup></b> | 61.4 (35.2)                          | 63.6 (30.5)          | 58.8 (30.7)                           | 63.9 (32.7)            | 56.6 (27.9)                           | 62.2 (28.0)            |
| <b>Absolute change<sup>b</sup></b>             | -3.4<br>(-13.2 to 6.3)               | 0.8<br>(-7.6 to 9.1) | -3.7<br>(-12.8 to 5.4)                | 1.9<br>(-6.7 to 10.4)  | -8.1<br>(-18.2 to 2.1)                | -3.9<br>(-16.1 to 8.3) |
| <b>% Change<sup>c</sup></b>                    | -5.3%                                | 1.2%                 | -5.9%                                 | 3.0%                   | -12.5%                                | -5.9%                  |
| <b>EORTC QLQ-C30: Emotional functioning</b>    |                                      |                      |                                       |                        |                                       |                        |

|                                                | Post-initiation visit |                       |                      |                        |                     |                        |
|------------------------------------------------|-----------------------|-----------------------|----------------------|------------------------|---------------------|------------------------|
|                                                | Month 1               | Month 2               | Month 3              | Month 4                | Month 5             | Month 6                |
| <b>Number of patients with paired scores</b>   | 44                    | 43                    | 36                   | 36                     | 33                  | 30                     |
| <b>Baseline score<sup>a</sup></b>              | 72.9 (22.2)           | 72.9 (22.3)           | 71.1 (22.9)          | 70.8 (23.1)            | 71.2 (23.4)         | 69.4 (23.9)            |
| <b>Post-initiation Month score<sup>a</sup></b> | 70.1 (27.8)           | 71.7 (23.9)           | 69.4 (22.9)          | 68.3 (27.4)            | 69.2 (26)           | 66.1 (24)              |
| <b>Absolute change<sup>b</sup></b>             | -2.8<br>(-8.3 to 2.6) | -1.2<br>(-5.8 to 3.4) | -1.6<br>(-8 to 4.7)  | -2.5<br>(-10.4 to 5.3) | -2<br>(-8.8 to 4.7) | -3.3<br>(-11 to 4.3)   |
| <b>% Change<sup>c</sup></b>                    | -3.9%                 | -1.6%                 | -2.3%                | -3.6%                  | -2.8%               | -4.8%                  |
| <b>EORTC QLQ-C30: Cognitive functioning</b>    |                       |                       |                      |                        |                     |                        |
| <b>Number of patients with paired scores</b>   | 44                    | 43                    | 36                   | 36                     | 33                  | 30                     |
| <b>Baseline score<sup>a</sup></b>              | 81.1 (18.5)           | 81 (18.8)             | 80.6 (19.3)          | 80.6 (19.3)            | 79.3 (20)           | 80.6 (19.1)            |
| <b>Post-initiation Month score<sup>a</sup></b> | 79.9 (22.6)           | 79.8 (24)             | 76.9 (21.6)          | 77.8 (22.9)            | 77.3 (23.5)         | 78.3 (22.4)            |
| <b>Absolute change<sup>b</sup></b>             | -1.1<br>(-6.9 to 4.6) | -1.2<br>(-7.8 to 5.5) | -3.7<br>(-10 to 2.6) | -2.8<br>(-9.2 to 3.6)  | -2<br>(-10.1 to 6)  | -2.2<br>(-10.4 to 5.9) |

|                                                | Post-initiation visit  |                     |                       |                       |                        |                       |
|------------------------------------------------|------------------------|---------------------|-----------------------|-----------------------|------------------------|-----------------------|
|                                                | Month 1                | Month 2             | Month 3               | Month 4               | Month 5                | Month 6               |
| <b>% Change<sup>c</sup></b>                    | -1.4%                  | -1.4%               | -4.6%                 | -3.4%                 | -2.5%                  | -2.8%                 |
| <b>EORTC QLQ-C30: Social functioning</b>       |                        |                     |                       |                       |                        |                       |
| <b>Number of patients with paired scores</b>   | 44                     | 43                  | 36                    | 36                    | 33                     | 30                    |
| <b>Baseline score<sup>a</sup></b>              | 67.4 (29)              | 66.3 (29)           | 63 (29.6)             | 63 (29.8)             | 64.6 (30.3)            | 65.6 (29)             |
| <b>Post-initiation Month score<sup>a</sup></b> | 62.1 (30.6)            | 65.1 (27.7)         | 66.2 (31)             | 69.9 (28.4)           | 63.1 (29.1)            | 68.9 (29.3)           |
| <b>Absolute change<sup>b</sup></b>             | -5.3<br>(-15.1 to 4.5) | -1.2<br>(-9.3 to 7) | 3.2<br>(-6.6 to 13.1) | 6.9<br>(-1.9 to 15.8) | -1.5<br>(-11.4 to 8.3) | 3.3<br>(-8.4 to 15.1) |
| <b>% Change<sup>c</sup></b>                    | -7.9%                  | -1.8%               | 5.1%                  | 11.0%                 | -2.3%                  | 5.1%                  |
| <b>EORTC QLQ-C30: Fatigue</b>                  |                        |                     |                       |                       |                        |                       |
| <b>Number of patients with paired scores</b>   | 44                     | 43                  | 36                    | 36                    | 33                     | 30                    |
| <b>Baseline score<sup>a</sup></b>              | 41.2 (22.6)            | 42.1 (22.7)         | 42.9 (22.2)           | 42.3 (23.1)           | 43.1 (23.9)            | 40 (19.9)             |
| <b>Post-initiation Month score<sup>a</sup></b> | 47.5 (28.9)            | 43.4 (27)           | 46.3 (25.5)           | 42 (26.4)             | 44.8 (23)              | 44.4 (26.7)           |



|                                                | Post-initiation visit |                      |                       |                       |                       |                       |
|------------------------------------------------|-----------------------|----------------------|-----------------------|-----------------------|-----------------------|-----------------------|
|                                                | Month 1               | Month 2              | Month 3               | Month 4               | Month 5               | Month 6               |
| <b>Absolute change<sup>b</sup></b>             | 6.3<br>(-2.8 to 15.4) | 1.3<br>(-6 to 8.6)   | 3.4<br>(-5.1 to 11.9) | -0.3<br>(-8.9 to 8.3) | 1.7<br>(-7.8 to 11.2) | 4.4<br>(-6.8 to 15.7) |
| <b>% Change<sup>c</sup></b>                    | 15.3%                 | 3.1%                 | 7.9%                  | -0.7%                 | 3.9%                  | 11.1%                 |
| <b>EORTC QLQ-C30: Nausea and vomiting</b>      |                       |                      |                       |                       |                       |                       |
| <b>Number of patients with paired scores</b>   | 44                    | 43                   | 36                    | 36                    | 33                    | 30                    |
| <b>Baseline score<sup>a</sup></b>              | 8.3 (15.5)            | 8.5 (15.6)           | 9.7 (16.6)            | 9.3 (16.6)            | 8.1 (16.7)            | 8.3 (17.4)            |
| <b>Post-initiation Month score<sup>a</sup></b> | 14.8 (20.1)           | 10.5 (15)            | 8.8 (15.2)            | 7.4 (12.9)            | 7.6 (14.5)            | 8.3 (12.2)            |
| <b>Absolute change<sup>b</sup></b>             | 6.4<br>(-0.9 to 13.8) | 1.9<br>(-3.6 to 7.4) | -0.9<br>(-6.6 to 4.8) | -1.9<br>(-7.4 to 3.7) | -0.5<br>(-5.3 to 4.3) | 0<br>(-5.7 to 5.7)    |
| <b>% Change<sup>c</sup></b>                    | 77.3%                 | 22.7%                | -9.5%                 | -20.0%                | -6.3%                 | 0.0%                  |
| <b>EORTC QLQ-C30: Pain</b>                     |                       |                      |                       |                       |                       |                       |
| <b>Number of patients with paired scores</b>   | 44                    | 43                   | 36                    | 36                    | 33                    | 30                    |
| <b>Baseline score<sup>a</sup></b>              | 26.1 (27.2)           | 26.7 (27.7)          | 25 (27.2)             | 24.5 (25.4)           | 23.2 (25)             | 27.8 (28.5)           |

|                                                | Post-initiation visit |                       |                       |                        |                       |                        |
|------------------------------------------------|-----------------------|-----------------------|-----------------------|------------------------|-----------------------|------------------------|
|                                                | Month 1               | Month 2               | Month 3               | Month 4                | Month 5               | Month 6                |
| <b>Post-initiation Month score<sup>a</sup></b> | 29.2 (33)             | 29.8 (29.9)           | 27.3 (25.6)           | 20.4 (24.6)            | 26.3 (25.7)           | 28.9 (26.6)            |
| <b>Absolute change<sup>b</sup></b>             | 3<br>(-6.8 to 12.8)   | 3.1<br>(-5.6 to 11.8) | 2.3<br>(-7.2 to 11.9) | -4.2<br>(-13.8 to 5.5) | 3<br>(-7.6 to 13.6)   | 1.1<br>(-11.6 to 13.9) |
| <b>% Change<sup>c</sup></b>                    | 11.6%                 | 11.6%                 | 9.3%                  | -17.0%                 | 13.0%                 | 4.0%                   |
| <b>EORTC QLQ-C30: Dyspnea</b>                  |                       |                       |                       |                        |                       |                        |
| <b>Number of patients with paired scores</b>   | 44                    | 43                    | 36                    | 36                     | 33                    | 30                     |
| <b>Baseline score<sup>a</sup></b>              | 15.2 (20.9)           | 17.1 (24.5)           | 13.9 (21.6)           | 14.8 (21.7)            | 14.1 (22.1)           | 11.1 (16)              |
| <b>Post-initiation Month score<sup>a</sup></b> | 23.5 (25.5)           | 19.4 (25.4)           | 25.9 (28.9)           | 15.7 (24.5)            | 19.2 (25)             | 14.4 (18.9)            |
| <b>Absolute change<sup>b</sup></b>             | 8.3<br>(0.7 to 15.9)  | 2.3<br>(-3.8 to 8.4)  | 12<br>(1.9 to 22.2)   | 0.9<br>(-6.5 to 8.3)   | 5.1<br>(-2.8 to 12.9) | 3.3<br>(-4.2 to 10.9)  |
| <b>% Change<sup>c</sup></b>                    | 55.0%                 | 13.6%                 | 86.7%                 | 6.2%                   | 35.7%                 | 30.0%                  |
| <b>EORTC QLQ-C30: Insomnia</b>                 |                       |                       |                       |                        |                       |                        |

|                                                | Post-initiation visit |                       |                       |                        |                        |                        |
|------------------------------------------------|-----------------------|-----------------------|-----------------------|------------------------|------------------------|------------------------|
|                                                | Month 1               | Month 2               | Month 3               | Month 4                | Month 5                | Month 6                |
| <b>Number of patients with paired scores</b>   | 44                    | 43                    | 36                    | 36                     | 33                     | 30                     |
| <b>Baseline score<sup>a</sup></b>              | 37.9 (37.1)           | 38.8 (37)             | 36.1 (37.7)           | 33.3 (34.7)            | 37.4 (36.1)            | 35.6 (34.9)            |
| <b>Post-initiation Month score<sup>a</sup></b> | 39.4 (36.8)           | 45 (34)               | 40.7 (27.7)           | 27.8 (29.3)            | 31.3 (31.1)            | 40 (34.4)              |
| <b>Absolute change<sup>b</sup></b>             | 1.5<br>(-8.5 to 11.5) | 6.2<br>(-4.4 to 16.8) | 4.6<br>(-5.9 to 15.1) | -5.6<br>(-18.3 to 7.2) | -6.1<br>(-16.1 to 3.9) | 4.4<br>(-11.5 to 20.4) |
| <b>% Change<sup>c</sup></b>                    | 4.0%                  | 16.0%                 | 12.8%                 | -16.7%                 | -16.2%                 | 12.5%                  |
| <b>EORTC QLQ-C30: Appetite loss</b>            |                       |                       |                       |                        |                        |                        |
| <b>Number of patients with paired scores</b>   | 44                    | 43                    | 36                    | 36                     | 33                     | 30                     |
| <b>Baseline score<sup>a</sup></b>              | 28.8 (31)             | 29.5 (31)             | 26.9 (30.7)           | 29.6 (30.6)            | 28.3 (30.2)            | 27.8 (29.1)            |
| <b>Post-initiation Month score<sup>a</sup></b> | 31.1 (39)             | 29.5 (31)             | 36.1 (31.2)           | 22.2 (26.4)            | 28.3 (27.8)            | 23.3 (26.5)            |
| <b>Absolute change<sup>b</sup></b>             | 2.3<br>(-10 to 14.5)  | 0<br>(-9.5 to 9.5)    | 9.3<br>(-2.4 to 20.9) | -7.4<br>(-17.5 to 2.7) | 0<br>(-12.9 to 12.9)   | -4.4<br>(-16.6 to 7.7) |

|                                                | Post-initiation visit  |                      |                     |                       |                        |                       |
|------------------------------------------------|------------------------|----------------------|---------------------|-----------------------|------------------------|-----------------------|
|                                                | Month 1                | Month 2              | Month 3             | Month 4               | Month 5                | Month 6               |
| <b>% Change<sup>c</sup></b>                    | 7.9%                   | 0.0%                 | 34.5%               | -25.0%                | 0.0%                   | -16.0%                |
| <b>EORTC QLQ-C30: Constipation</b>             |                        |                      |                     |                       |                        |                       |
| <b>Number of patients with paired scores</b>   | 44                     | 43                   | 36                  | 36                    | 33                     | 30                    |
| <b>Baseline score<sup>a</sup></b>              | 19.7 (27.2)            | 20.2 (27.4)          | 16.7 (24.6)         | 19.4 (25.7)           | 22.2 (29.7)            | 24.4 (28.9)           |
| <b>Post-initiation Month score<sup>a</sup></b> | 15.2 (25.4)            | 17.1 (31.2)          | 14.8 (24.5)         | 18.5 (24.5)           | 13.1 (24.9)            | 14.4 (27.2)           |
| <b>Absolute change<sup>b</sup></b>             | -4.5<br>(-12.3 to 3.2) | -3.1<br>(-12 to 5.8) | -1.9<br>(-9 to 5.3) | -0.9<br>(-9.2 to 7.4) | -9.1<br>(-20.3 to 2.1) | -10<br>(-22.7 to 2.7) |
| <b>% Change<sup>c</sup></b>                    | -23.1%                 | -15.4%               | -11.1%              | -4.8%                 | -40.9%                 | -40.9%                |
| <b>EORTC QLQ-C30: Diarrhea</b>                 |                        |                      |                     |                       |                        |                       |
| <b>Number of patients with paired scores</b>   | 44                     | 43                   | 36                  | 36                    | 33                     | 30                    |
| <b>Baseline score<sup>a</sup></b>              | 17.4 (28.3)            | 17.1 (27.6)          | 19.4 (30.2)         | 19.4 (30.2)           | 22.2 (30.8)            | 21.1 (30.9)           |
| <b>Post-initiation Month score<sup>a</sup></b> | 22.7 (32.8)            | 26.4 (33.8)          | 25 (33.2)           | 17.6 (29.3)           | 28.3 (34.5)            | 23.3 (29.2)           |

|                                                | Post-initiation visit |                        |                       |                        |                       |                      |
|------------------------------------------------|-----------------------|------------------------|-----------------------|------------------------|-----------------------|----------------------|
|                                                | Month 1               | Month 2                | Month 3               | Month 4                | Month 5               | Month 6              |
| <b>Absolute change<sup>b</sup></b>             | 5.3<br>(-4.7 to 15.3) | 9.3<br>(-0.8 to 19.4)  | 5.6<br>(-5.4 to 16.5) | -1.9<br>(-11.9 to 8.2) | 6.1<br>(-4.4 to 16.5) | 2.2<br>(-10 to 14.4) |
| <b>% Change<sup>c</sup></b>                    | 30.4%                 | 54.5%                  | 28.6%                 | -9.5%                  | 27.3%                 | 10.5%                |
| <b>EORTC QLQ-C30: Financial difficulties</b>   |                       |                        |                       |                        |                       |                      |
| <b>Number of patients with paired scores</b>   | 44                    | 43                     | 36                    | 36                     | 33                    | 30                   |
| <b>Baseline score<sup>a</sup></b>              | 17.4 (27.4)           | 17.1 (26.6)            | 19.4 (29.1)           | 20.4 (29)              | 19.2 (28.9)           | 18.9 (28.6)          |
| <b>Post-initiation Month score<sup>a</sup></b> | 18.2 (30)             | 12.4 (26.2)            | 19.4 (32.2)           | 20.4 (34.1)            | 20.2 (32.2)           | 18.9 (29.9)          |
| <b>Absolute change<sup>b</sup></b>             | 0.8<br>(-6 to 7.5)    | -4.7<br>(-10.8 to 1.5) | 0<br>(-6.6 to 6.6)    | 0<br>(-7.1 to 7.1)     | 1<br>(-7.1 to 9.1)    | 0<br>(-9.2 to 9.2)   |
| <b>% Change<sup>c</sup></b>                    | 4.3%                  | -27.3%                 | 0.0%                  | 0.0%                   | 5.3%                  | 0.0%                 |

**Table S7. EORTC QLQ-GI.NET21 scores during the first 6 months of treatment with everolimus.** Data presented as: <sup>a</sup>mean (standard deviation); <sup>b</sup>mean change from baseline (95% confidence intervals); <sup>c</sup>% change in mean from baseline; <sup>d</sup>mean score (95% confidence intervals) – treatment -related symptoms scale only completed by n=17 patients at baseline therefore post-initiation data were not compared with baseline.

|                                                      | Post-initiation visit |                       |                       |                      |                       |                     |
|------------------------------------------------------|-----------------------|-----------------------|-----------------------|----------------------|-----------------------|---------------------|
|                                                      | Month 1               | Month 2               | Month 3               | Month 4              | Month 5               | Month 6             |
| <b>EORTC QLQ-GI.NET21: Endocrine symptoms</b>        |                       |                       |                       |                      |                       |                     |
| <b>Number of patients with paired scores</b>         | 44                    | 43                    | 36                    | 35                   | 33                    | 30                  |
| <b>Baseline score<sup>a</sup></b>                    | 13.6 (16.3)           | 14.0 (16.6)           | 14.8 (17.6)           | 15.6 (17.7)          | 15.2 (18.4)           | 14.4 (16.3)         |
| <b>Post-initiation score at Month<sup>a</sup></b>    | 12.9 (17.0)           | 11.1 (19.8)           | 12.3 (16.5)           | 12.4 (17.8)          | 12.8 (15.5)           | 12.6 (15.4)         |
| <b>Absolute change<sup>b</sup></b>                   | -0.8<br>(-6.3 to 4.8) | -2.8<br>(-8.8 to 3.1) | -2.5<br>(-8.1 to 3.2) | -3.2<br>(-10.4 to 4) | -2.4<br>(-8.9 to 4.2) | -1.9<br>(-9 to 5.3) |
| <b>% Change<sup>c</sup></b>                          | -5.6%                 | -20.4%                | -16.7%                | -20.4%               | -15.6%                | -12.8%              |
| <b>EORTC QLQ-GI.NET21: Gastrointestinal symptoms</b> |                       |                       |                       |                      |                       |                     |
| <b>Number of patients with paired scores</b>         | 44                    | 43                    | 36                    | 35                   | 33                    | 30                  |

|                                                    | Post-initiation visit |                      |                        |                          |                        |                          |
|----------------------------------------------------|-----------------------|----------------------|------------------------|--------------------------|------------------------|--------------------------|
|                                                    | Month 1               | Month 2              | Month 3                | Month 4                  | Month 5                | Month 6                  |
| <b>Baseline score<sup>a</sup></b>                  | 23.9 (19.8)           | 23.9 (20.1)          | 24.4 (20.2)            | 25.7 (20.7)              | 26.1 (20.0)            | 25.8 (18.4)              |
| <b>Post-initiation Month score<sup>a</sup></b>     | 25.8 (24.6)           | 23.3 (20.1)          | 20.2 (14.2)            | 19.0 (15.0)              | 20.8 (17.4)            | 21.8 (17.9)              |
| <b>Absolute change<sup>b</sup></b>                 | 1.8<br>(-5.6 to 9.2)  | -0.6<br>(-6.2 to 5)  | -4.3<br>(-10.2 to 1.7) | -6.7<br>(-13 to -0.3)    | -5.3<br>(-11.4 to 0.9) | -4.0<br>(-12 to 4)       |
| <b>% Change<sup>c</sup></b>                        | 7.6%                  | -2.6%                | -17.4%                 | -25.9%                   | -20.2%                 | -15.5%                   |
| <b>EORTC QLQ-GI.NET21: Social function</b>         |                       |                      |                        |                          |                        |                          |
| <b>Number of patients with paired scores</b>       | 44                    | 43                   | 36                     | 35                       | 33                     | 30                       |
| <b>Baseline score<sup>a</sup></b>                  | 42.2 (25.9)           | 42.4 (25.5)          | 44.1 (26.2)            | 46.0 (25.3)              | 44.1 (24.6)            | 44.8 (24.0)              |
| <b>Post-initiation Month score<sup>a</sup></b>     | 41.2 (23.1)           | 39.0 (23.8)          | 42.6 (24.4)            | 35.9 (26.4)              | 39.1 (24.2)            | 34.4 (22.9)              |
| <b>Absolute change<sup>b</sup></b>                 | -1<br>(-7.2 to 5.2)   | -3.4<br>(-10 to 3.3) | -1.5<br>(-9.4 to 6.4)  | -10.2<br>(-17.1 to -3.2) | -5.1<br>(-13.1 to 3)   | -10.4<br>(-18.4 to -2.4) |
| <b>% Change<sup>c</sup></b>                        | -2.4%                 | -7.9%                | -3.5%                  | -22.1%                   | -11.5%                 | -23.1%                   |
| <b>EORTC QLQ-GI.NET21: Disease related worries</b> |                       |                      |                        |                          |                        |                          |

|                                                     | Post-initiation visit         |                                |                        |                        |                        |                        |
|-----------------------------------------------------|-------------------------------|--------------------------------|------------------------|------------------------|------------------------|------------------------|
|                                                     | Month 1                       | Month 2                        | Month 3                | Month 4                | Month 5                | Month 6                |
| <b>Number of patients with paired scores</b>        | 44                            | 43                             | 36                     | 35                     | 33                     | 30                     |
| <b>Baseline score<sup>a</sup></b>                   | 49.4 (29.3)                   | 47.0 (28.9)                    | 51.1 (28.0)            | 51.9 (28.5)            | 49.2 (27.1)            | 50.9 (28.3)            |
| <b>Post-initiation Month score<sup>a</sup></b>      | 37.4 (22.0)                   | 38.9 (26.3)                    | 44.8 (23.5)            | 45.2 (27.3)            | 42.1 (27.4)            | 43.7 (27.0)            |
| <b>Absolute change<sup>b</sup></b>                  | <b>-12</b><br>(-18.6 to -5.4) | <b>-8.1</b><br>(-14.7 to -1.6) | -6.3<br>(-12.6 to 0)   | -6.7<br>(-14.8 to 1.5) | -7.1<br>(-14.5 to 0.4) | -7.2<br>(-16.2 to 1.8) |
| <b>% Change<sup>c</sup></b>                         | -24.3%                        | -17.3%                         | -12.4%                 | -12.8%                 | -14.4%                 | -14.2%                 |
| <b>EORTC QLQ-GI.NET21: Muscle/bone pain symptom</b> |                               |                                |                        |                        |                        |                        |
| <b>Number of patients with paired scores</b>        | 44                            | 43                             | 36                     | 35                     | 33                     | 30                     |
| <b>Baseline score<sup>a</sup></b>                   | 33.3 (26.1)                   | 32.6 (26.7)                    | 35.2 (26.4)            | 33.3 (25.6)            | 35.4 (24.9)            | 33.3 (24.8)            |
| <b>Post-initiation Month score<sup>a</sup></b>      | 25.0 (25.0)                   | 24.8 (29.2)                    | 35.2 (26.4)            | 30.5 (27.3)            | 32.3 (27.0)            | 30.0 (29.5)            |
| <b>Absolute change<sup>b</sup></b>                  | -8.3<br>(-16.8 to 0.2)        | -7.8<br>(-18.9 to 3.4)         | 0.0<br>(-12.1 to 12.1) | -2.9<br>(-13.4 to 7.7) | -3.0<br>(-14.2 to 8.2) | -3.3<br>(-15.7 to 9)   |



|                                                               | Post-initiation visit |                      |                      |                      |                      |                      |
|---------------------------------------------------------------|-----------------------|----------------------|----------------------|----------------------|----------------------|----------------------|
|                                                               | Month 1               | Month 2              | Month 3              | Month 4              | Month 5              | Month 6              |
| <b>% Change<sup>c</sup></b>                                   | -25.0%                | -23.8%               | 0.0%                 | -8.6%                | -8.6%                | -10.0%               |
| <b>EORTC QLQ-GI.NET21: Information/communication function</b> |                       |                      |                      |                      |                      |                      |
| <b>Number of patients with paired scores</b>                  | 44                    | 43                   | 36                   | 35                   | 33                   | 30                   |
| <b>Baseline score<sup>a</sup></b>                             | 2.3 (8.4)             | 2.3 (8.6)            | 01.9 (7.7)           | 1.9 (7.9)            | 1.0 (5.8)            | 1.1 (6.1)            |
| <b>Post-initiation Month score<sup>a</sup></b>                | 2.3 (14.9)            | 3.1 (16.0)           | 04.6 (14.1)          | 1.9 (7.9)            | 4.0 (13.8)           | 1.1 (6.1)            |
| <b>Absolute change<sup>b</sup></b>                            | 0.0<br>(-5.4 to 5.4)  | 0.8<br>(-4.9 to 6.5) | 2.8<br>(-2.9 to 8.4) | 0.0<br>(-2.8 to 2.8) | 3.0<br>(-2.4 to 8.4) | 0.0<br>(-3.3 to 3.3) |
| <b>% Change</b>                                               | 0.0%                  | 33.3%                | 150.0%               | 0.0%                 | 300.0%               | 0.0%                 |
| <b>EORTC QLQ-GI.NET21: Body image</b>                         |                       |                      |                      |                      |                      |                      |
| <b>Number of patients with paired scores</b>                  | 44                    | 43                   | 36                   | 35                   | 33                   | 30                   |
| <b>Baseline score<sup>a</sup></b>                             | 21.2 (31.2)           | 21.7 (31.6)          | 25.9 (33.0)          | 22.9 (31.1)          | 25.3 (34.4)          | 20.0 (29.8)          |
| <b>Post-initiation Month score<sup>a</sup></b>                | 22.7 (31.0)           | 24.0 (30.3)          | 24.1 (31.5)          | 19.0 (27.2)          | 23.2 (33.8)          | 21.1 (29.7)          |

|                                                                         | Post-initiation visit |                        |                        |                        |                        |                       |
|-------------------------------------------------------------------------|-----------------------|------------------------|------------------------|------------------------|------------------------|-----------------------|
|                                                                         | Month 1               | Month 2                | Month 3                | Month 4                | Month 5                | Month 6               |
| <b>Absolute change<sup>b</sup></b>                                      | 1.5<br>(-5.4 to 8.4)  | 2.3<br>(-8.3 to 12.9)  | -1.9<br>(-11.2 to 7.5) | -3.8<br>(-13.7 to 6.1) | -2.0<br>(-11.8 to 7.8) | 1.1<br>(-11.8 to 14)  |
| <b>% Change<sup>c</sup></b>                                             | 7.1%                  | 10.7%                  | -7.1%                  | -16.7%                 | -8.0%                  | 5.6%                  |
| <b>EORTC QLQ-GI.NET21: Sexual function</b>                              |                       |                        |                        |                        |                        |                       |
| <b>Number of patients with paired scores</b>                            | 20                    | 19                     | 18                     | 17                     | 17                     | 15                    |
| <b>Baseline score<sup>a</sup></b>                                       | 33.3 (39.0)           | 40.4 (38.5)            | 37.0 (36.6)            | 37.3 (39.4)            | 37.3 (34.8)            | 35.6 (39.4)           |
| <b>Post-initiation Month score<sup>a</sup></b>                          | 36.7 (38.8)           | 38.6 (40.5)            | 42.6 (37.6)            | 43.1 (42.1)            | 43.1 (42.1)            | 37.8 (41.5)           |
| <b>Absolute change<sup>b</sup></b>                                      | 3.3<br>(-7.9 to 14.5) | -1.8<br>(-11.7 to 8.2) | 5.6<br>(-6.2 to 17.3)  | 5.9<br>(-5 to 16.8)    | 5.9<br>(-8 to 19.7)    | 2.2<br>(-6.2 to 10.7) |
| <b>% Change<sup>c</sup></b>                                             | 10.0%                 | -4.3%                  | 15.0%                  | 15.8%                  | 15.8%                  | 6.2%                  |
| <b>EORTC QLQ-GI.NET21: Treatment related symptoms scale<sup>d</sup></b> |                       |                        |                        |                        |                        |                       |
|                                                                         | Month 1               | Month 2                | Month 3                | Month 4                | Month 5                | Month 6               |
| <b>Number of patients</b>                                               | 41                    | 33                     | 32                     | 33                     | 30                     | 24                    |

|                         | Post-initiation visit |                     |                     |                    |                     |                    |
|-------------------------|-----------------------|---------------------|---------------------|--------------------|---------------------|--------------------|
|                         | Month 1               | Month 2             | Month 3             | Month 4            | Month 5             | Month 6            |
| Mean score <sup>d</sup> | 23.3 (18.5 to 28.1)   | 20.7 (15.0 to 26.4) | 22.0 (16.8 to 27.3) | 15.3 (9.7 to 20.9) | 18.9 (13.4 to 24.4) | 14.1 (9.3 to 18.9) |

**Table S8. EQ-ED-5L scores during the first 6 months of treatment with everolimus.** Data presented as: <sup>a</sup>mean (Standard deviation); <sup>b</sup>mean change from baseline (95% confidence intervals); <sup>c</sup>% change in mean from baseline.

|                                                                                                                    | Post-initiation visit       |                             |                             |                             |                            |                            |
|--------------------------------------------------------------------------------------------------------------------|-----------------------------|-----------------------------|-----------------------------|-----------------------------|----------------------------|----------------------------|
|                                                                                                                    | Month 1                     | Month 2                     | Month 3                     | Month 4                     | Month 5                    | Month 6                    |
| <b>EQ-5D composite health index (mobility, self-care, usual activity, pain/discomfort, and anxiety/depression)</b> |                             |                             |                             |                             |                            |                            |
| Number of patients with paired scores                                                                              | 43                          | 43                          | 36                          | 36                          | 32                         | 30                         |
| Baseline score <sup>a</sup>                                                                                        | 0.724 (0.201)               | 0.727 (0.169)               | 0.720 (0.159)               | 0.705 (0.162)               | 0.711 (0.127)              | 0.701 (0.156)              |
| Post-initiation score at Month <sup>a</sup>                                                                        | 0.682 (0.250)               | 0.694 (0.207)               | 0.670 (0.180)               | 0.698 (0.174)               | 0.715 (0.183)              | 0.725 (0.153)              |
| Absolute change <sup>b</sup>                                                                                       | -0.042<br>(-0.098 to 0.014) | -0.032<br>(-0.092 to 0.028) | -0.050<br>(-0.106 to 0.006) | -0.007<br>(-0.063 to 0.049) | 0.004<br>(-0.052 to 0.061) | 0.024<br>(-0.029 to 0.077) |

|                                                | Post-initiation visit |                       |                       |                      |                      |                       |
|------------------------------------------------|-----------------------|-----------------------|-----------------------|----------------------|----------------------|-----------------------|
|                                                | Month 1               | Month 2               | Month 3               | Month 4              | Month 5              | Month 6               |
| <b>% Change<sup>c</sup></b>                    | -5.8%                 | -4.4%                 | -7.0%                 | -1.0%                | 0.6%                 | 3.4%                  |
| <b>EQ-5D self-rated (global) health status</b> |                       |                       |                       |                      |                      |                       |
| <b>Number of patients with paired scores</b>   | 43                    | 43                    | 36                    | 36                   | 32                   | 30                    |
| <b>Baseline score<sup>a</sup></b>              | 67.6 (19.5)           | 67.7 (17.1)           | 66.8 (16.7)           | 66.1 (17.1)          | 65.6 (16.4)          | 68.3 (15.2)           |
| <b>Post-initiation Month score<sup>a</sup></b> | 65.3 (23.0)           | 66.8 (19.0)           | 63.2 (17.3)           | 68.4 (16.5)          | 66.6 (17.8)          | 67.9 (17.5)           |
| <b>Absolute change<sup>b</sup></b>             | -2.4<br>(-8.1 to 3.4) | -0.8<br>(-7.1 to 5.4) | -3.6<br>(-8.9 to 1.7) | 2.4<br>(-2.6 to 7.4) | 1.0<br>(-4.6 to 6.6) | -0.4<br>(-7.1 to 6.3) |
| <b>% Change<sup>c</sup></b>                    | -3.5%                 | -1.2%                 | -5.4%                 | 3.6%                 | 1.5%                 | -0.6%                 |
