# Supplementary material
Source: publisher figshare collection journal article supplement (https://karger.figshare.com/articles/dataset/_/7969646)
Supplement: Supplementary file 2 [file 1]

**Patients enrolled**

n=52

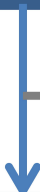

**Did not meet eligibility  
criteria**

n=4

**Eligible patients enrolled**

n=48

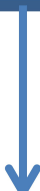

**Completed at least one  
safety assessment**

Safety set: n=48

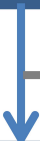

**Did not complete any  
HRQoL questionnaires**

n=2

**Completed at least one  
HRQoL questionnaire**

Full analysis set (FAS): n=46
